# Supplementary material for: Sorption of surfactants onto sediment at environmentally relevant concentrations:independent-mode as unifying concept
Source: Royal Society of Chemistry journal article supplement (doi:10.1039/c9em00580c), 2020-01-01
Supplement: c9em00580c1.pdf [file c9em00580c1.pdf]

**Table S1:** Surfactant sorption data where direct analysis of both the sediment and water phase have been applied.

| Substance                       | Type of sediment (fraction)    | Ionic strength | Conc range of surfactant | Type of sorption isotherm | $K_{p,0}^{total}$ (L/kg) | $K_p^{hydr}$ (L/kg) | oc%         | $K_{p,0}^{elec}$ (L/kg) | $C_s^{max}$ (mg/kg) | Reference     |
|---------------------------------|--------------------------------|----------------|--------------------------|---------------------------|--------------------------|---------------------|-------------|-------------------------|---------------------|---------------|
| C10-LAS                         | aquifer sediment (< 1 mm)      | no             | 5-8000 mg/L (mixture)    | Langmuir                  |                          |                     | 0.17        | 26                      | 1989                | Istok 1999    |
| C11-LAS                         | aquifer sediment (< 1 mm)      | no             | 5-8000 mg/L (mixture)    | Langmuir                  |                          |                     | 0.17        | 93                      | 3449                | Istok 1999    |
| C12-LAS                         | aquifer sediment (< 1 mm)      | no             | 5-8000 mg/L (mixture)    | Langmuir                  |                          |                     | 0.17        | 211                     | 2770                | Istok 1999    |
| C13-LAS                         | aquifer sediment (< 1 mm)      | no             | 5-8000 mg/L (mixture)    | Langmuir                  |                          |                     | 0.17        | 2115                    | 396                 | Istok 1999    |
|                                 |                                |                |                          |                           |                          |                     |             |                         |                     |               |
| <sup>14</sup> C10-LAS           | EPA-12                         | 0.01 M NaN3    | 0 - 7 µmol/L             | Virial                    | 15.1                     |                     | 2.3         |                         | 0.465 mmol/kg       | Westall 1999  |
| <sup>14</sup> C12-LAS           | EPA-12                         | 0.01 M NaN3    | 0 - 4 µmol/L             | Virial                    | 77                       |                     | 2.3         |                         | 0.465 mmol/kg       | Westall 1999  |
| <sup>14</sup> C14-LAS           | EPA-12                         | 0.01 M NaN3    | 0 - 0.5 µmol/L           | Virial                    | 709                      |                     | 2.3         |                         | 0.465 mmol/kg       | Westall 1999  |
|                                 |                                |                |                          |                           |                          |                     |             |                         |                     |               |
| C10-comm LAS                    | 2 river sediments (< 0.125 mm) | 10 mM NaHCO3   | 1 - 12 mg/L              | Henry's law region        |                          | 15                  | TOC =22.2 % |                         |                     | Marchesi 1991 |
| C11-comm LAS                    | 2 river sediments (< 0.125 mm) | 10 mM NaHCO3   | 1 - 12 mg/L              | Henry's law region        |                          | 54                  | TOC =22.2 % |                         |                     | Marchesi 1991 |
| C12-comm LAS                    | 2 river sediments (< 0.125 mm) | 10 mM NaHCO3   | 1 - 12 mg/L              | Henry's law region        |                          | 317                 | TOC =22.2 % |                         |                     | Marchesi 1991 |
| C13 comm LAS                    | 2 river sediments (< 0.125 mm) | 10 mM NaHCO3   | 1 - 12 mg/L              | Henry's law region        |                          | 23700               | TOC =22.2 % |                         |                     | Marchesi 1991 |
|                                 |                                |                |                          |                           |                          |                     |             |                         |                     |               |
| <sup>14</sup> C-LAS comm        | river sediment 1               | 0.01 M KCl     | 0.25 - 7.5 mg/L          | Langmuir                  | 343                      |                     | 1.13        |                         | 3125                | Matthijs 1985 |
| <sup>14</sup> C-LAS comm        | river sediment 2               | 0.01 M KCl     | 0.25 - 9 mg/L            | Langmuir                  | 211                      |                     | 1           |                         | 1923                | Matthijs 1985 |
| <sup>14</sup> C-LAS comm        | river sediment 3               | 0.01 M KCl     | 0.25 - 7 mg/L            | Langmuir                  | 347                      |                     | 1           |                         | 4348                | Matthijs 1985 |
| <sup>14</sup> C-LAS comm        | river sediment 4               | 0.01 M KCl     | 0.25 - 6.5 mg/L          | Langmuir                  | 440                      |                     | 3.41        |                         | 4000                | Matthijs 1985 |
| <sup>14</sup> C-LAS comm        | river sediment 5               | 0.01 M KCl     | 0.25 - 10 mg/L           | Langmuir                  | 176                      |                     | 0.34        |                         | 1471                | Matthijs 1985 |
| <sup>14</sup> C-LAS comm        | river sediment 6               | 0.01 M KCl     | 0.25 - 8.5 mg/L          | Langmuir                  | 256                      |                     | 0.67        |                         | 2326                | Matthijs 1985 |
| <sup>14</sup> C-LAS comm        | river sediment 7               | 0.01 M KCl     | 0.25 - 8.5 mg/L          | Langmuir                  | 218                      |                     | 1.34        |                         | 3125                | Matthijs 1985 |
| <sup>14</sup> C-LAS comm        | kaolin                         | 0.01 M KCl     | 0.25 - 5 mg/L            | Langmuir                  | 18                       |                     | 0           |                         | 131                 | Matthijs 1985 |
| <sup>14</sup> C-LAS comm        | Aldrich humic acid             | 0.01 M KCl     | 0.25 - 2 mg/L            | Langmuir                  | 1200                     |                     | n.s.        |                         | 8568                | Matthijs 1985 |
|                                 |                                |                |                          |                           |                          |                     |             |                         |                     |               |
| C <sub>10</sub> EO <sub>8</sub> | Marine (Frisian Front)         | 100 mg/L NaN3  | 0.005-111 mg/L           | Independent               |                          | 9.4                 | 0.27        | 663                     | 0.61 - 0.95         | Droge 2007    |

|                                 |                                          |                           |                  | mode             |      |      |          |       | mmol/kg             |            |
|---------------------------------|------------------------------------------|---------------------------|------------------|------------------|------|------|----------|-------|---------------------|------------|
| C <sub>12</sub> EO <sub>8</sub> | Marine (Frisian Front)                   | 100 mg/L NaN <sub>3</sub> | 0.03 - 40.1 mg/L | Independent mode |      | 103  | 0.27     | 3540  | 0.40 - 0.93 mmol/kg | Droge 2007 |
| C <sub>14</sub> EO <sub>8</sub> | Marine (Frisian Front)                   | 100 mg/L NaN <sub>3</sub> | 0.0004-2.77 mg/L | Independent mode |      | 1402 | 0.27     | 39170 | 0.18 - 0.66 mmol/kg | Droge 2007 |
| NPEO <sub>3</sub>               | native sed (normal+org free) (<0.125 mm) | 10 mM NaHCO <sub>3</sub>  | 0.1 - 5 μM       | Henry's law      | 1460 | 230  | 0 and 20 |       |                     | John 2000  |
| NPEO <sub>4</sub>               | native sed (normal+org free) (<0.125 mm) | 10 mM NaHCO <sub>3</sub>  | 0.1 - 5 μM       | Henry's law      | 930  | 270  | 0 and 20 |       |                     | John 2000  |
| NPEO <sub>5</sub>               | native sed (normal+org free) (<0.125 mm) | 10 mM NaHCO <sub>3</sub>  | 0.1 - 5 μM       | Henry's law      | 750  | 320  | 0 and 20 |       |                     | John 2000  |
| NPEO <sub>6</sub>               | native sed (normal+org free) (<0.125 mm) | 10 mM NaHCO <sub>3</sub>  | 0.1 - 5 μM       | Henry's law      | 700  | 360  | 0 and 20 |       |                     | John 2000  |
| NPEO <sub>7</sub>               | native sed (normal+org free) (<0.125 mm) | 10 mM NaHCO <sub>3</sub>  | 0.1 - 5 μM       | Henry's law      | 590  | 330  | 0 and 20 |       |                     | John 2000  |
| NPEO <sub>8</sub>               | native sed (normal+org free) (<0.125 mm) | 10 mM NaHCO <sub>3</sub>  | 0.1 - 5 μM       | Henry's law      | 550  | 400  | 0 and 20 |       |                     | John 2000  |
| NPEO <sub>9</sub>               | native sed (normal+org free) (<0.125 mm) | 10 mM NaHCO <sub>3</sub>  | 0.1 - 5 μM       | Henry's law      | 540  | 460  | 0 and 20 |       |                     | John 2000  |
| NPEO <sub>10</sub>              | native sed (normal+org free) (<0.125 mm) | 10 mM NaHCO <sub>3</sub>  | 0.1 - 5 μM       | Henry's law      | 450  | 480  | 0 and 20 |       |                     | John 2000  |
| NPEO <sub>11</sub>              | native sed (normal+org free) (<0.125 mm) | 10 mM NaHCO <sub>3</sub>  | 0.1 - 5 μM       | Henry's law      | 550  | 530  | 0 and 20 |       |                     | John 2000  |
| NPEO <sub>12</sub>              | native sed (normal+org free) (<0.125 mm) | 10 mM NaHCO <sub>3</sub>  | 0.1 - 5 μM       | Henry's law      | 750  | 590  | 0 and 20 |       |                     | John 2000  |

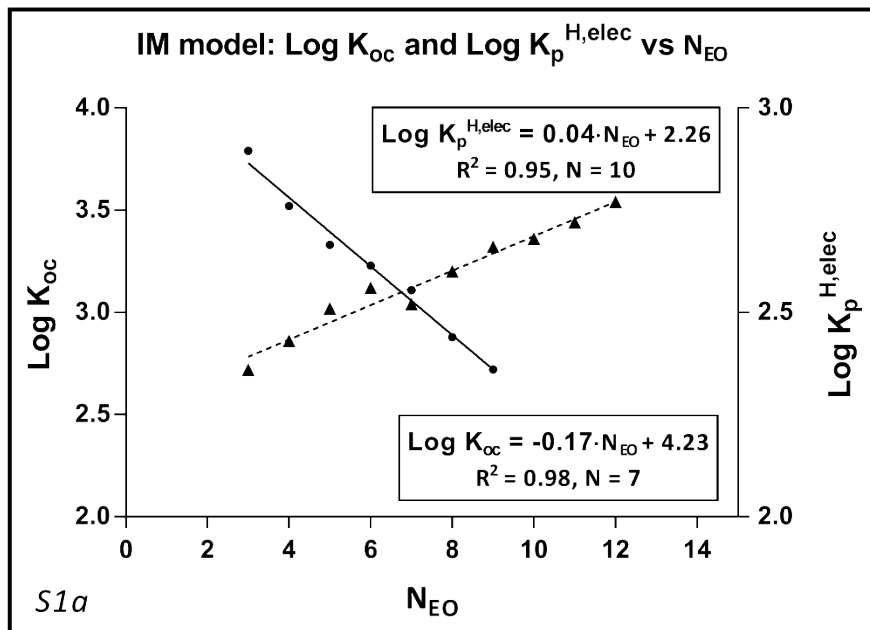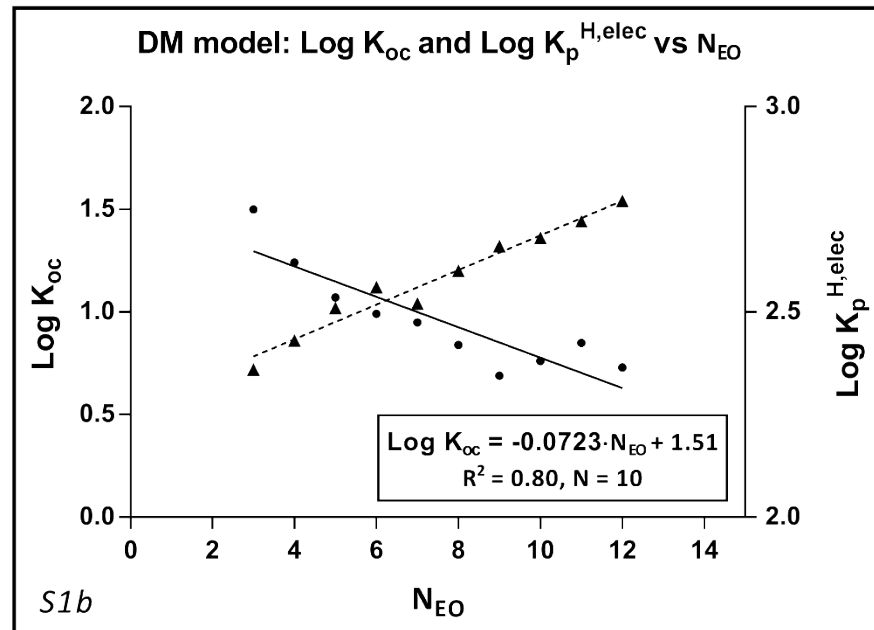

**Fig S1.** log  $K_{oc}$  and log  $K_p^{H,elec}$  with the EO number ( $N_{EO}$ ) for NPEO<sub>x</sub> based on partition coefficients derived according to the IM model (S1a) and DM model (S1b). Data taken from Table 4a and 4b adapted from John<sup>1</sup>.

**Table S2.** Sorption of data of phenanthrene on sea sediment<sup>2</sup>.

|   |      | $1/Q_0=1/C_s^{max}$ | $f_{oc}$ (%) | $C_{s,hydr}^{max}$<br>(mg/kg) | $C_{s,hydr}^{max}$<br>(mmol/kg) | $b =$<br>$1/K_L C_s^{max}$ | $K_L C_s^{max}$ | $K_L$ (L/mmol) | $K^{L,hydr}_{p,0}$ | $K_{oc}$ |
|---|------|---------------------|--------------|-------------------------------|---------------------------------|----------------------------|-----------------|----------------|--------------------|----------|
| 1 |      | 0.0127              | 0.58         | 78.7                          | 0.44                            | 0.0058                     | 172.41379       | 3.90E+02       | 172                | 29727    |
| 2 |      | 0.012               | 0.42         | 83.3                          | 0.47                            | 0.0064                     | 156.25          | 3.34E+02       | 156                | 37202    |
| 3 | H2O  | 0.0083              | 0.75         | 120                           | 0.68                            | 0.0049                     | 204.08163       | 3.02E+02       | 204                | 27211    |
| 3 | HCl  | 0.0098              | 0.81         | 102                           | 0.57                            | 0.0058                     | 172.41379       | 3.01E+02       | 172                | 21286    |
| 3 | H2O2 | 0.0496              | 0.08         | 20.2                          | 0.11                            | 0.0344                     | 29.069767       | 2.57E+02       | 29                 | 36337    |

The table above leads to an average  $K_L^{Hydr} = 316$  L/mmol or an average  $K_{oc}$  of 30400 L/kg for phenanthrene in the applied experimental system.

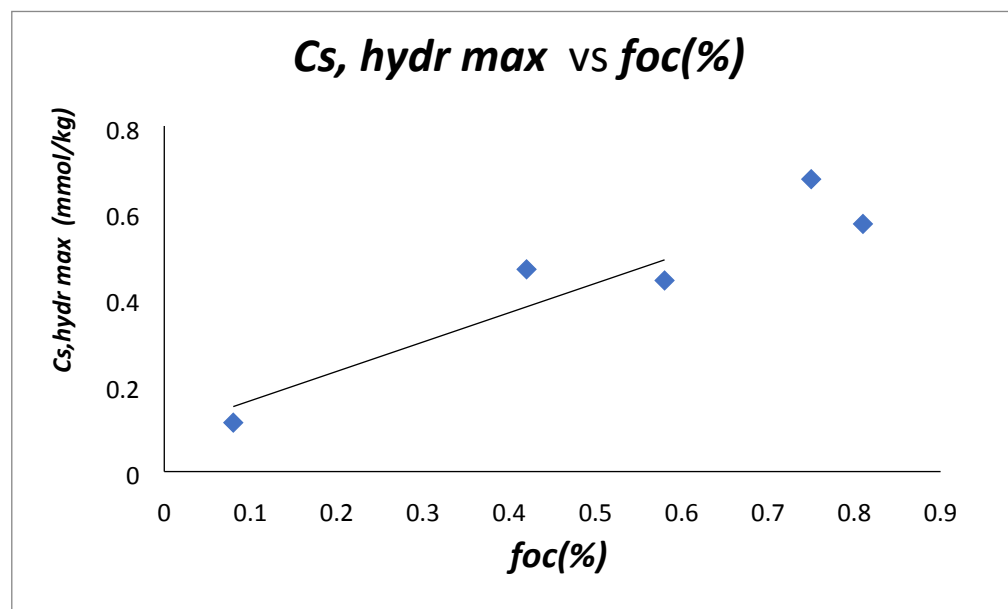

**Fig S2:** Correlation of  $C_{s,hydr}^{max}$  vs  $f_{oc}$  (%) based on data from Table S2

## References

1. W. W. John; G. Bao; W. P. Johnson; T. B. Stauffer *Environ. Sci. Technol.* 2000, **34**, 672-679.
2. G. Yang; X. Zheng *Environmental toxicology and chemistry* 2010, **29**, 2169-2176.
